# Supplementary material
Source: publisher figshare collection journal article supplement (https://tandf.figshare.com/articles/dataset/_/1295463)

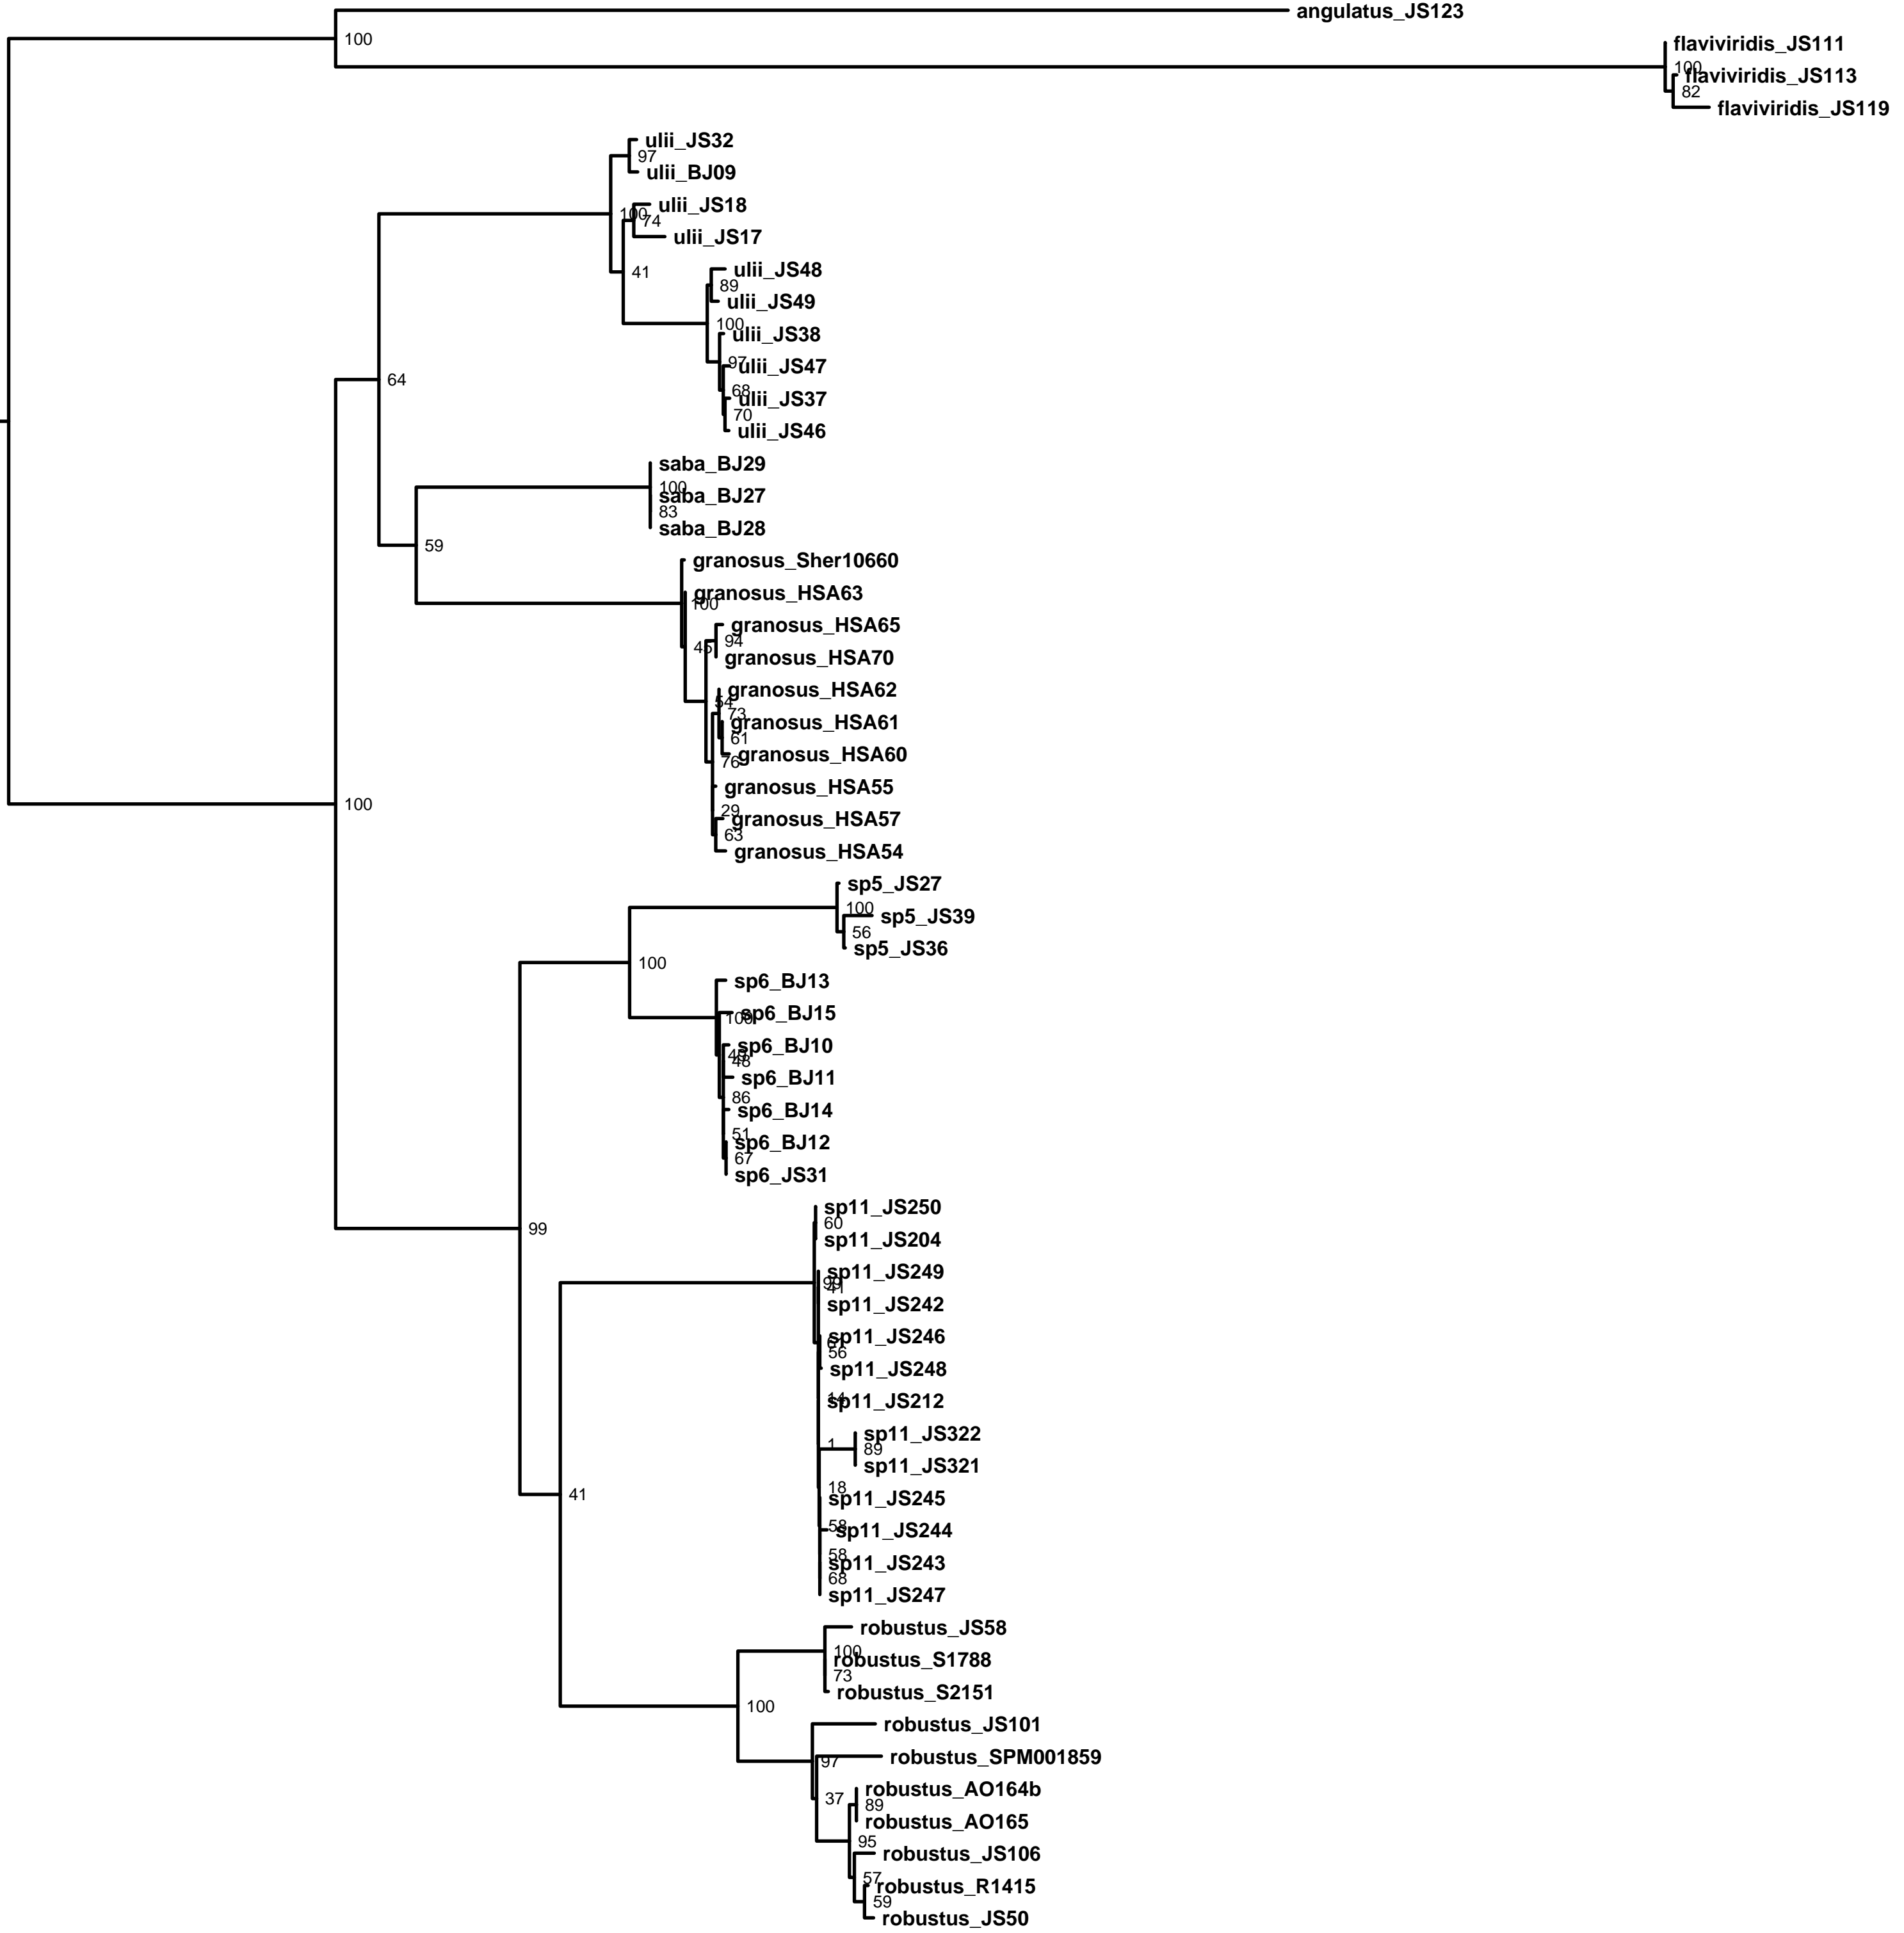

0.05

Supplement: Supplementary file 1 [file 2]
